# Supplementary material for: Astaxanthin prevents osteoarthritis by blocking Rspo2-mediated Wnt/β-catenin signaling in chondrocytes and abolishing Rspo2-related inflammatory factors in macrophages
Source: publisher site journal article supplement (doi:10.18632/aging.204837), 2023-06-23
Supplement: Supplementary file [file aging-v15i12-204837-supplementary-material-SD1.pdf]

## SUPPLEMENTARY TABLE

**Supplementary Table 1. Primers used in this study.**

| <b>Primer</b> | <b>Forward primer 5'-3'</b> | <b>Reverse primer 5'-3'</b> |
|---------------|-----------------------------|-----------------------------|
| iNOS          | CACCTTGGAGTTCACCCAGT        | ACCACTCGTACTTGGGATGC        |
| TNF- $\alpha$ | ACGGCATGGATCTCAAAGAC        | TTGGTTGTAGAGGGCAAGGACCT     |
| IL-1 $\beta$  | GCTGCTTCCAAACCTTTGAC        | AGCTTCTCCACAGCCACAAT        |
| Arg-1         | CTCCAAGCCAAAGTCCTTAGAG      | AGGAGCTATCATTAGGGACATC      |
| IL-10         | GCTCCTAGAGCTGCGGACT         | TGTTGTCCAGCTGGTCCTTT        |
| Rspo2         | TGGCTCAGTGTGTGCTGAGAGAAT    | AAGGTCACGAGTGAGTAGCGCATT    |
| Col-2         | TGGACGATCAGGCGAAACC         | GCTGCGGATGCTCTCAATCT        |
| Aggrecan      | GGTGAACCAGTTGTGTTGTC        | CCGTCCTTTCCAGCAGTC          |
| Sox-9         | AGGAAGCTCGCGGACCAGTAC       | GGTGGTCCTTCTTGTGCTGCAC      |
| MMP-1         | ATGAAGCAGCCCAGATGTGGAG      | TGGTCCACATCTGCTCTTGGCA      |
| MMP-3         | CACTCACAGACCTGACTCGGTT      | AAGCAGGATCACAGTTGGCTGG      |
| MMP-9         | GTACCACGGCCAACTACGAC        | GCCTTGGAAGATGAATGGAA        |
| MMP-13        | CCTTGATGCCATTACCAGTCTCC     | AAACAGCTCCGCATCAACCTGC      |
| IL-6          | AGACAGCCACTCACCTCTTCAG      | TTCTGCCAGTGCCTCTTTGCTG      |
| VEGF          | CCTGTGTGCCGCTGATG           | CGCATGATCTGCATGGTGAT        |
| GAPDH         | CAAATTCCATGGCACCCTCA        | GACTCCACGACGTACTCAGC        |
